# Supplementary material for: Copolymerization and phase separation behaviors of benzoxazine–amine thermosets
Source: Royal Society of Chemistry journal article supplement (doi:10.1039/c6ra23509c), 2016-01-01
Supplement: c6ra23509c1.pdf [file c6ra23509c1.pdf]

## Copolymerization and Phase Separation Behaviors of Benzoxazine-Amine Thermoset

YaZhen Xu, Jun Wang, FeiYa Fu, and XiangDong Liu\*

Key Laboratory of Advanced Textile Materials and Manufacturing Technology, Ministry of Education, College of Materials and Textile, Zhejiang Sci-Tech University, Xiasha Higher Education Zone, Hangzhou 310018, P.R. China.

### Supporting Information

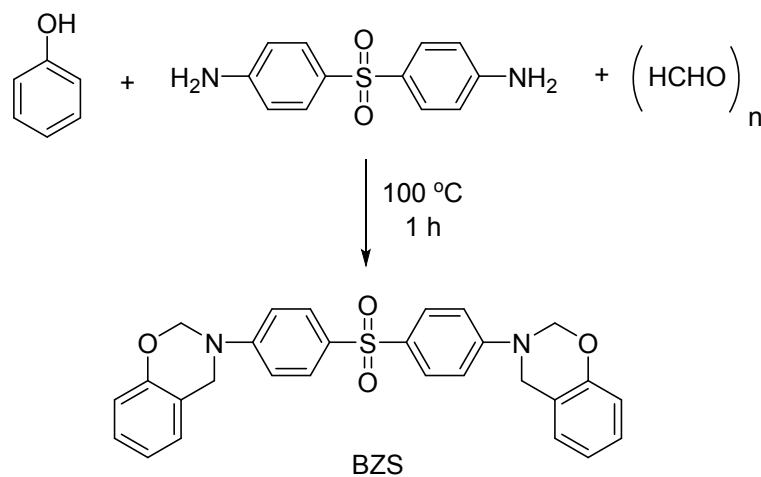

Figure S1. Synthetic process of containing sulfone-Benzoxazine Monomer

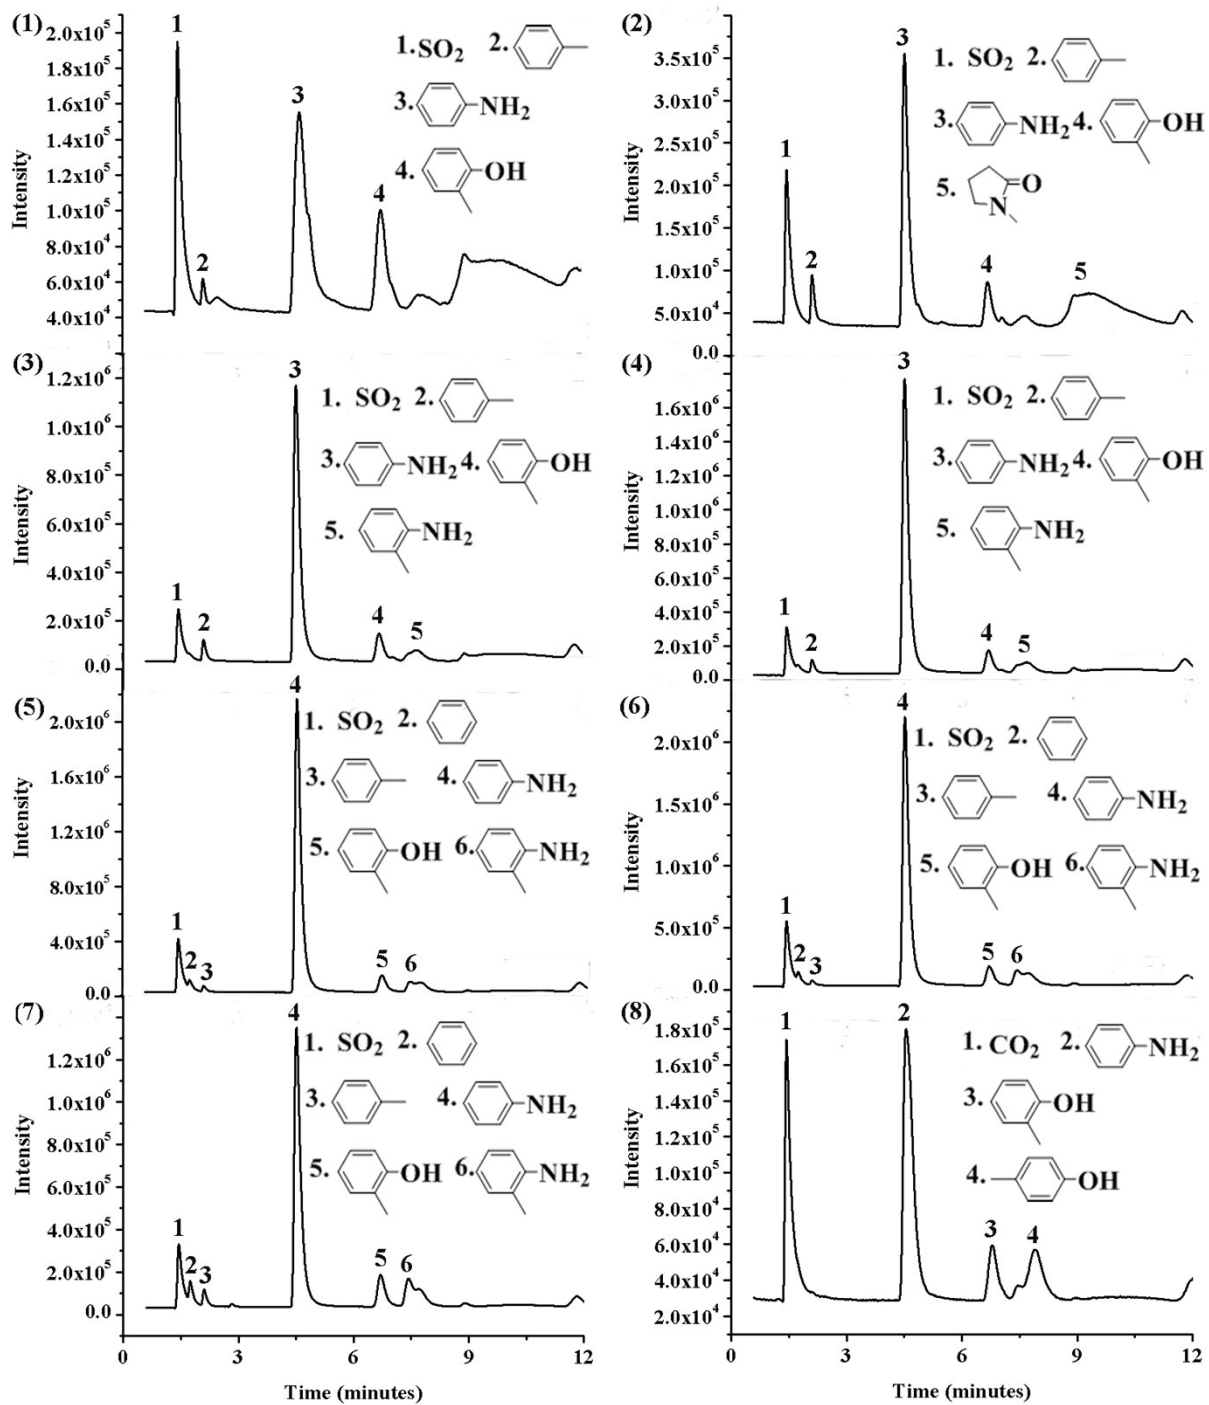

**Figure S2.** GC/MS results of the decomposition product evolved from the cured CBZS1 resin. TGA times are (1) 20 min, (2) 25 min, (3) 27 min, (4) 29.5 min, (5) 32 min, (6) 34 min, (7) 40min, (8) 42 min, (9) 46 min, and (10) 72 min, respectively.

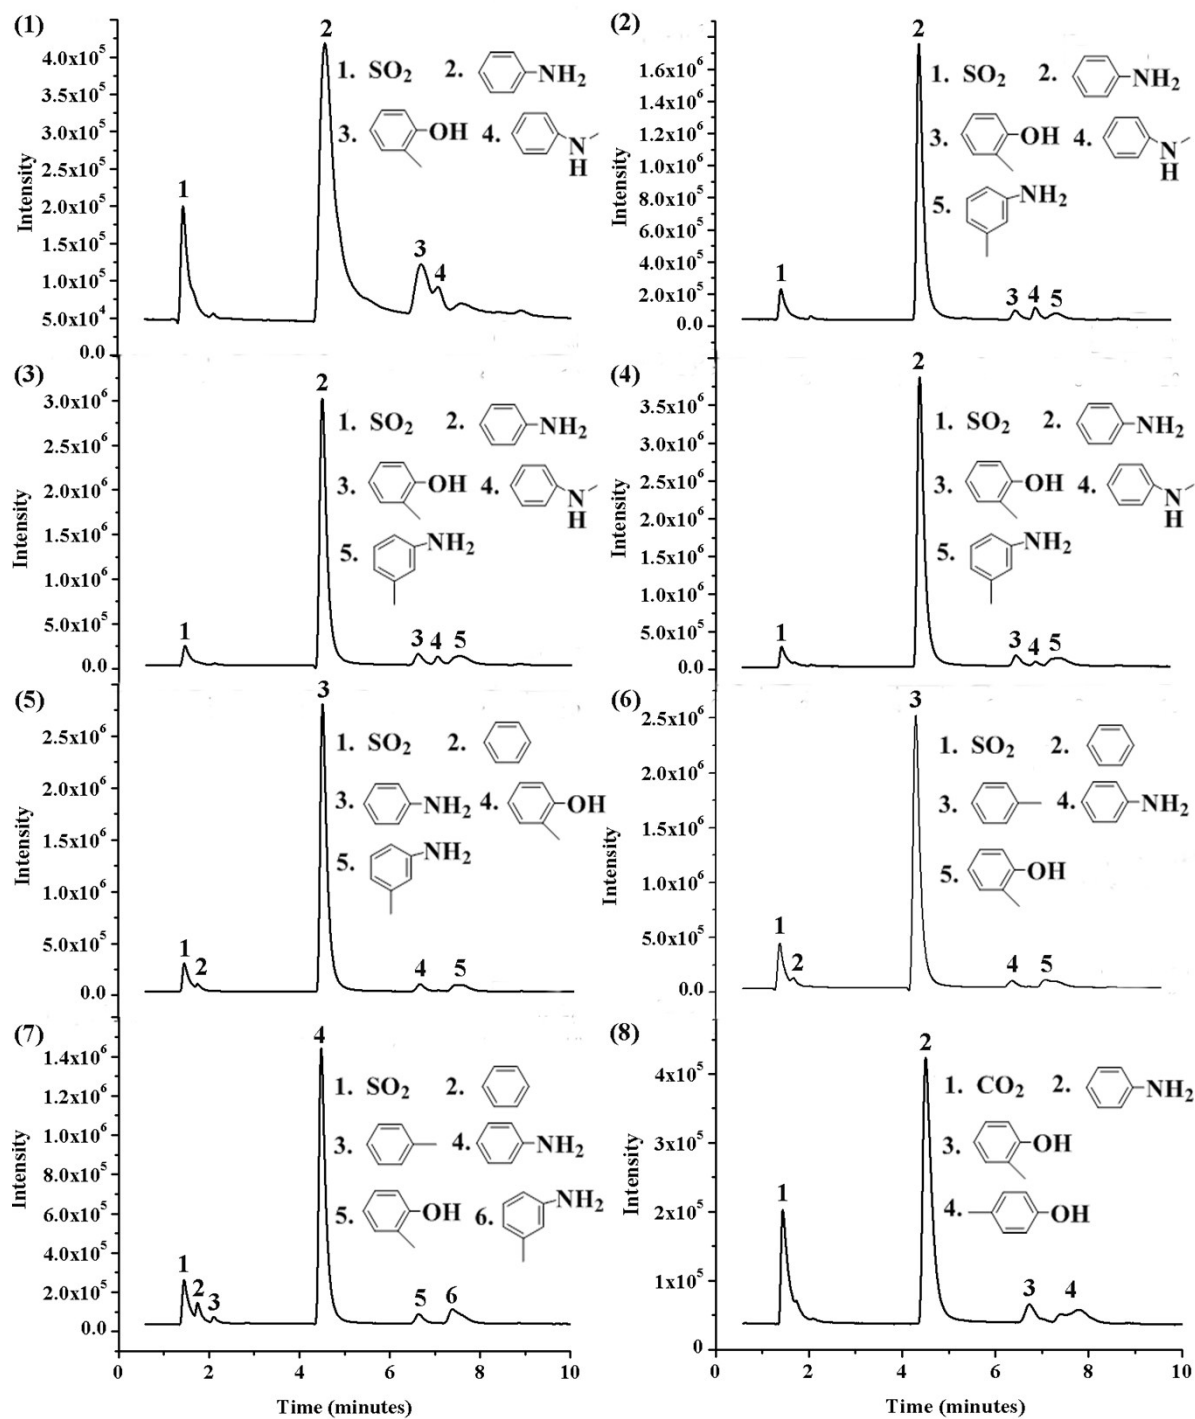

**Figure S3.** GC/MS results of the decomposition product evolved from the cured MBZ2 resin. TGA times are (1) 20 min, (2) 25 min, (3) 27 min, (4) 29.5 min, (5) 32 min, (6) 34 min, (7) 40min, (8) 42 min, (9) 46 min, and (10) 72 min, respectively.

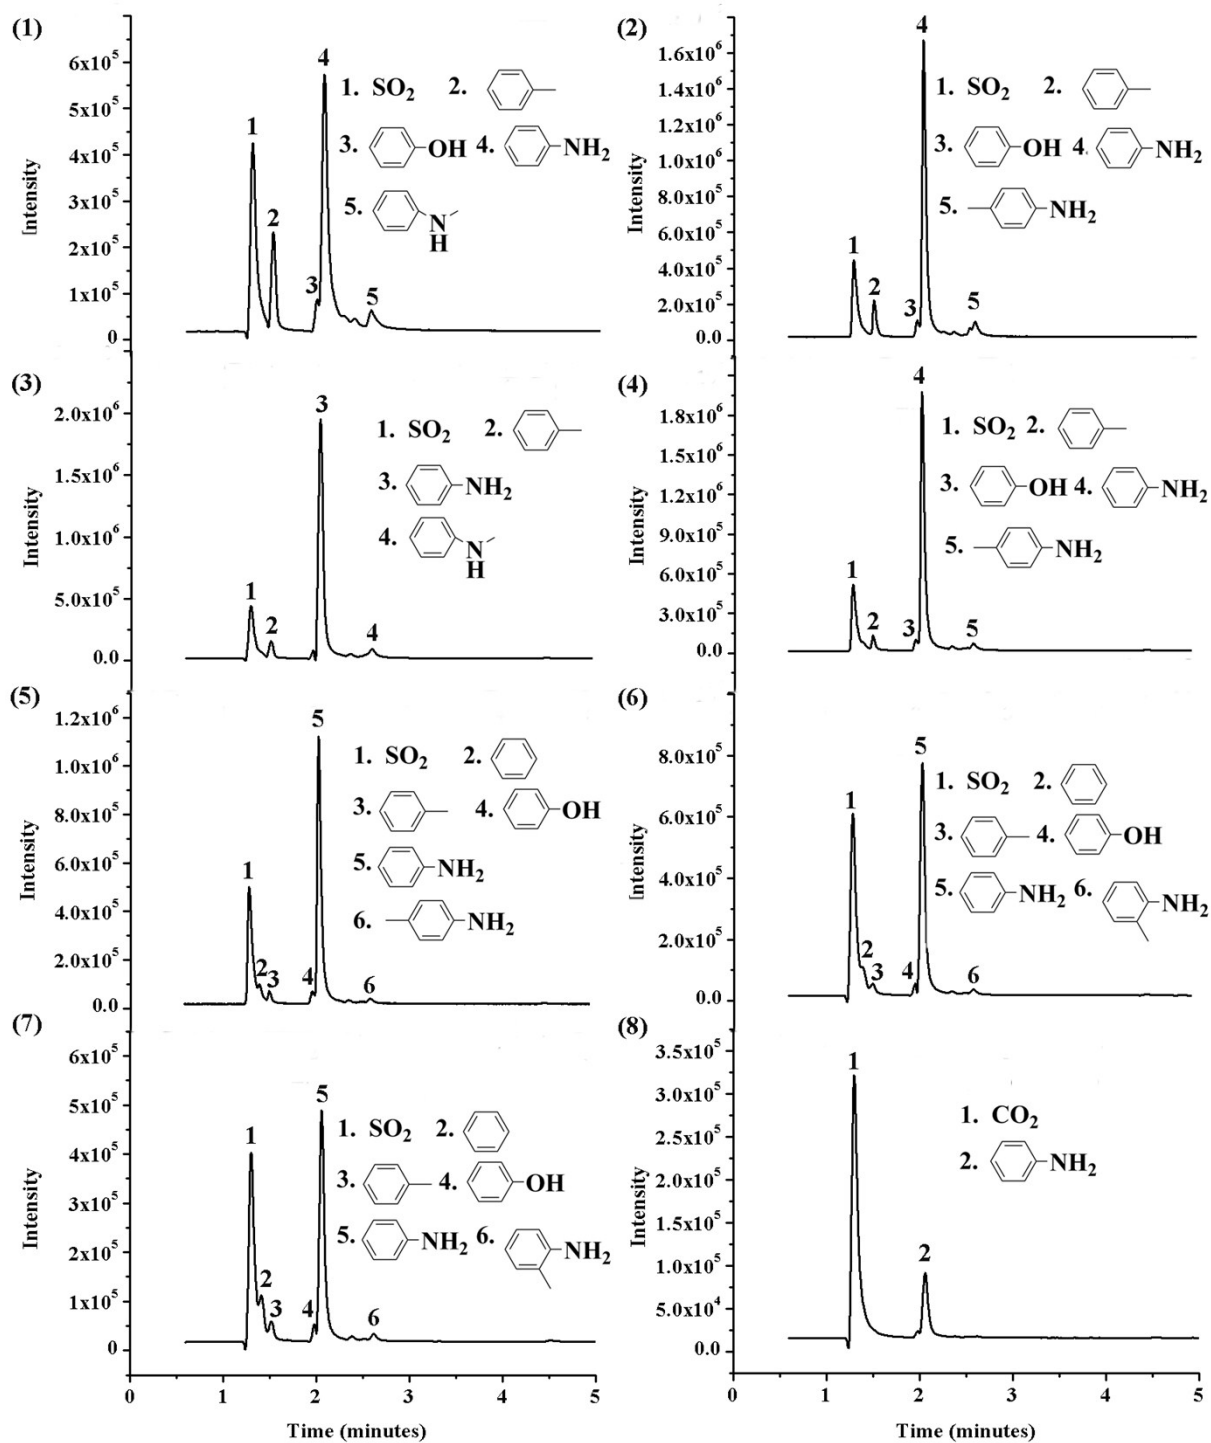

**Figure S4.** GC/MS results of the decomposition product evolved from the cured MBZ4 resin. TGA times are (1) 20 min, (2) 25 min, (3) 27 min, (4) 29.5 min, (5) 32 min, (6) 34 min, (7) 40min, (8) 42 min, (9) 46 min, and (10) 72 min, respectively.
